# Supplementary material for: The construction of a multifunctional luminescent Eu-MOF for the sensing of Fe3+, Cr2O72− and amines in aqueous solution
Source: Royal Society of Chemistry journal article supplement (doi:10.1039/d1ce01192h), 2021-01-01
Supplement: d1ce01192h1.pdf [file d1ce01192h1.pdf]

## The construction of a multifunctional luminescent Eu-MOF for the sensing of Fe<sup>3+</sup>, Cr<sub>2</sub>O<sub>7</sub><sup>2-</sup> and amines in aqueous solution

Cui-Li Wang, Ya-Xin Zheng, Le Chen, Cai-Yong Zhu, Wei Gao\*, Peng Li, Jie-Ping Liu and Xiu-Mei Zhang\*

Table S1 Selected bond lengths (Å) and angles (°) for 1-Eu.

| MOF         | 1-Eu       |
|-------------|------------|
| Eu1-O6A     | 2.300(3)   |
| Eu1-O6B     | 2.300(3)   |
| Eu1-O1C     | 2.310(3)   |
| Eu1-O1      | 2.310(3)   |
| Eu1-O9B     | 2.503(3)   |
| Eu1-O9A     | 2.503(3)   |
| Eu1-O10A    | 2.522(3)   |
| Eu1-O10B    | 2.522(3)   |
| Eu2-O7      | 2.369(3)   |
| Eu2-O7D     | 2.369(3)   |
| Eu2-O4D     | 2.546(3)   |
| Eu2-O4      | 2.546(3)   |
| Eu2-O12E    | 2.546(3)   |
| Eu2-O12F    | 2.546(3)   |
| Eu2-O3      | 2.555(3)   |
| Eu2-O3D     | 2.555(3)   |
| Eu2-O11E    | 2.607(3)   |
| Eu2-O11F    | 2.607(3)   |
| O6A-Eu1-O6B | 96.58(16)  |
| O6A-Eu1-O1C | 156.09(12) |
| O6B-Eu1-O1C | 93.73(11)  |
| O6A-Eu1-O1  | 93.73(11)  |
| O6B-Eu1-O1  | 156.09(12) |
| O1C-Eu1-O1  | 85.24(16)  |
| O6A-Eu1-O9B | 72.32(10)  |

|               |            |
|---------------|------------|
| O6B-Eu1-O9B   | 77.90(11)  |
| O1C-Eu1-O9B   | 131.15(11) |
| O1-Eu1-O9B    | 84.82(12)  |
| O6A-Eu1-O9A   | 75.86(12)  |
| O6B-Eu1-O9A   | 123.98(11) |
| O1C-Eu1-O9A   | 131.15(11) |
| O1-Eu1-O9A    | 84.82(12)  |
| O9B-Eu1-O9A   | 134.62(15) |
| O6A-Eu1-O10A  | 75.86(12)  |
| O6B-Eu1-O10A  | 123.98(11) |
| O1C-Eu1-O10A  | 79.48(11)  |
| O1-Eu1-O10A   | 80.47(12)  |
| O9B-Eu1-O10A  | 143.33(10) |
| O9A-Eu1-O10A  | 51.71(9)   |
| O6A-Eu1-O10B  | 123.98(10) |
| O6B-Eu1-O10B  | 75.86(12)  |
| O1C-Eu1-O10B  | 80.47(12)  |
| O1-Eu1-O10B   | 80.47(12)  |
| O9B-Eu1-O10B  | 51.71(9)   |
| O9A-Eu1-O10B  | 143.33(10) |
| O10A-Eu1-O10B | 152.64(14) |
| O7-Eu2-O7D    | 139.89(17) |
| O7-Eu2-O4D    | 143.17(10) |
| O7D-Eu2-O4D   | 69.60(11)  |
| O7-Eu2-O4     | 69.60(11)  |
| O7D-Eu2-O4    | 143.17(10) |
| O4D-Eu2-O4    | 97.57(14)  |
| O7-Eu2-O12E   | 88.36(12)  |
| O7D-Eu2-O12E  | 87.70(12)  |
| O4D-Eu2-O12E  | 119.87(11) |
| O4-Eu2-O12E   | 68.54(10)  |
| O7-Eu2-O12F   | 87.70(12)  |
| O7D-Eu2-O12E  | 88.36(12)  |
| O4D-Eu2-O12F  | 68.54(10)  |

|               |            |
|---------------|------------|
| O4-Eu2-O12F   | 119.87(11) |
| O12E-Eu2-O12F | 168.49(14) |
| O7-Eu2-O3     | 71.64(11)  |
| O7D-Eu2-O3    | 142.14(11) |
| O4D-Eu2-O3    | 73.74(9)   |
| O4-Eu2-O3     | 50.81(9)   |
| O12E-Eu2-O3   | 119.33(11) |
| O12F-Eu2-O3   | 69.44(11)  |
| O7-Eu2-O3D    | 142.14(10) |
| O7D-Eu2-O3D   | 71.64(11)  |
| O4D-Eu2-O3D   | 50.81(9)   |
| O4-Eu2-O3D    | 73.74(9)   |
| O12E-Eu2-O3D  | 69.44(11)  |
| O12F-Eu2-O3D  | 119.33(11) |
| O3-Eu2-O3D    | 92.43(16)  |
| O7-Eu2-O11E   | 78.00(12)  |
| O7D-Eu2-O11E  | 69.17(12)  |
| O4D-Eu2-O11E  | 137.78(11) |
| O4-Eu2-O11E   | 110.02(10) |
| O12E-Eu2-O11E | 49.88(10)  |
| O12F-Eu2-O11E | 118.66(10) |
| O3-Eu2-O11E   | 148.36(11) |
| O3D-Eu2-O11E  | 106.62(10) |
| O7-Eu2-O11F   | 69.17(12)  |
| O7D-Eu2-O11F  | 78.00(12)  |
| O4D-Eu2-O11F  | 110.02(10) |
| O4-Eu2-O11F   | 137.78(11) |
| O12E-Eu2-O11F | 118.66(10) |
| O12F-Eu2-O11F | 49.88(10)  |
| O3-Eu2-O11F   | 106.62(10) |
| O3D-Eu2-O11F  | 148.36(11) |
| O11E-Eu2-O11F | 69.47(13)  |

Symmetry codes: A  $-x+1/2, -y+2, z+1$ ; B  $x, y, z+1$ ; C  $-x+1/2, -y+2, z$ ;

D  $x, -y+5/2, -z+3/2$ ; E  $-x+1, y+1/2, z+1/2$ ; F  $-x+1, -y+2, -z+1$

---

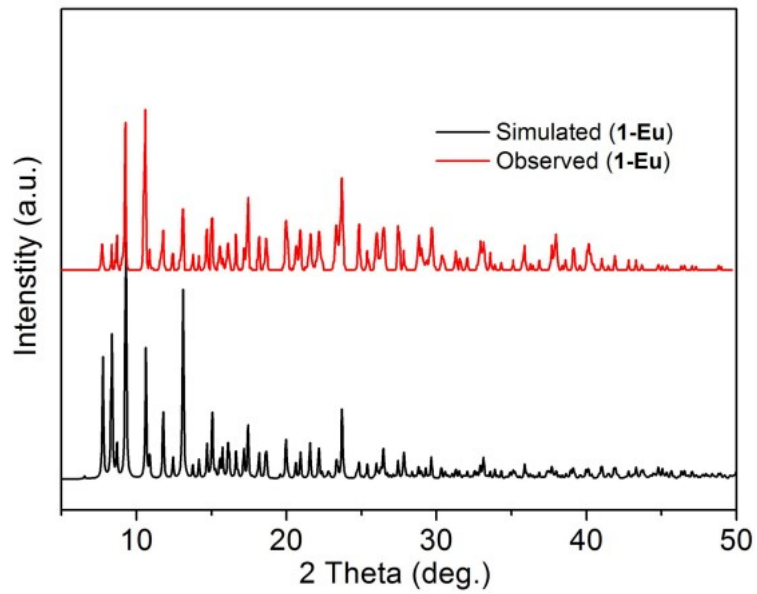

**Fig. S1** PXR D data as well as the simulated ones for **1-Eu**.

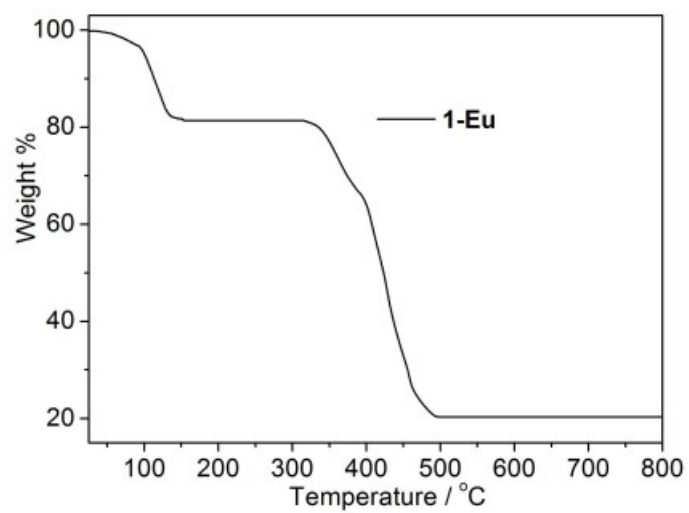

**Fig. S2** TGA plots of **1-Eu** under air atmosphere

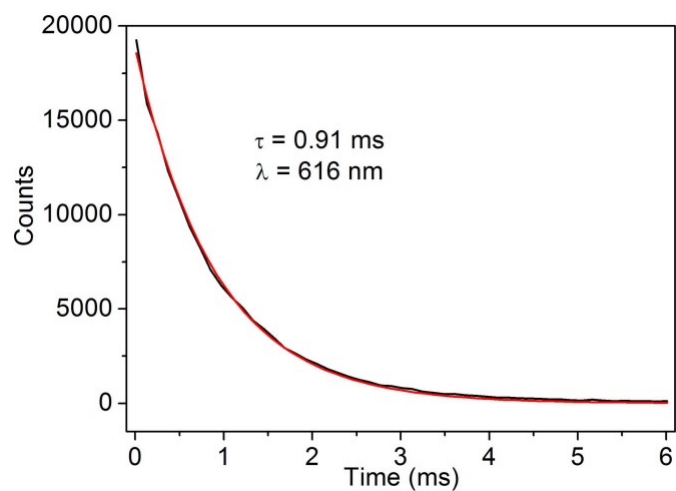

**Fig. S3** Emission decay curves of 1-Eu.

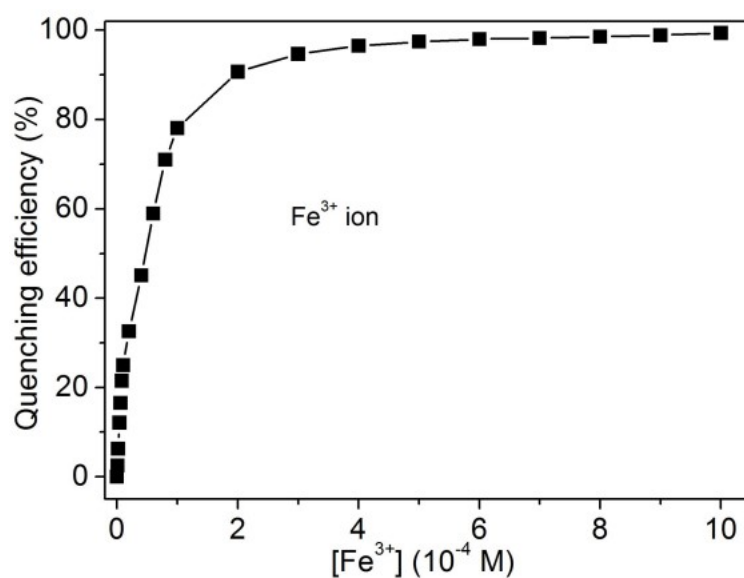

**Fig. S4** Quenching efficiency of 1-Eu dispersed in H<sub>2</sub>O with the addition of Fe<sup>3+</sup> solution.

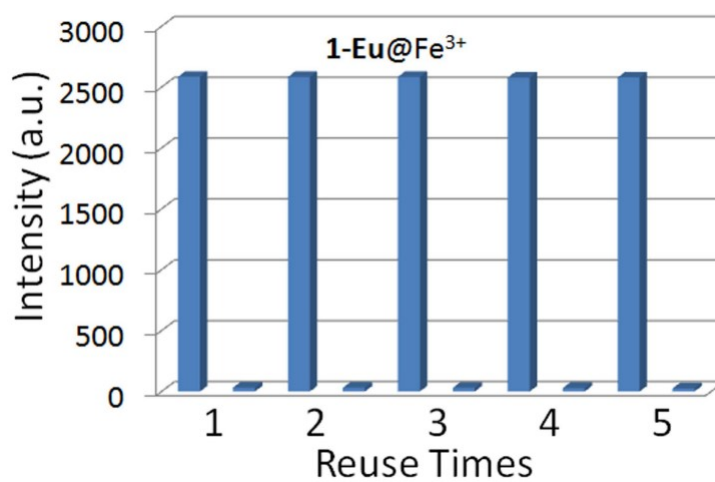

**Fig. S5** Repeatability of the quenching ability of **1-Eu** in H<sub>2</sub>O and in the presence of Fe<sup>3+</sup> (1 mM) ( $\lambda_{\text{ex}} = 322$  nm).

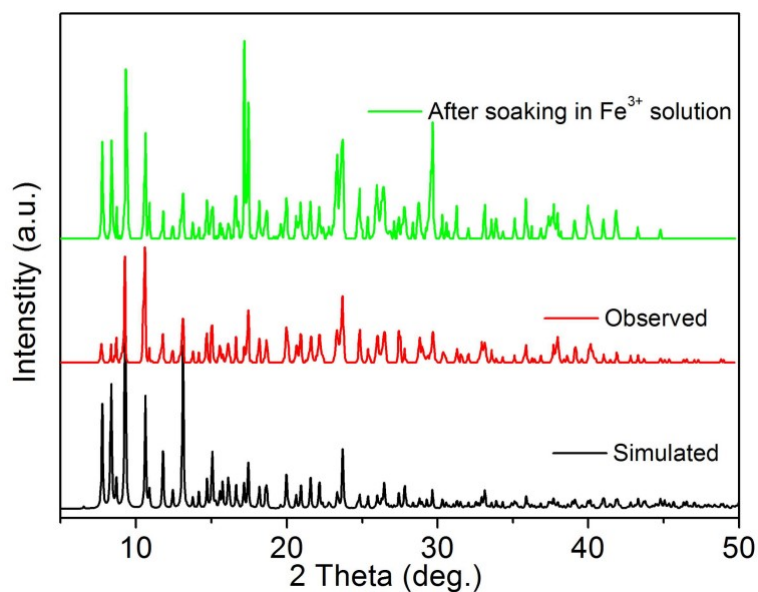

**Fig. S6** PXRD patterns of **1-Eu** after soaking in Fe<sup>3+</sup> solutions.

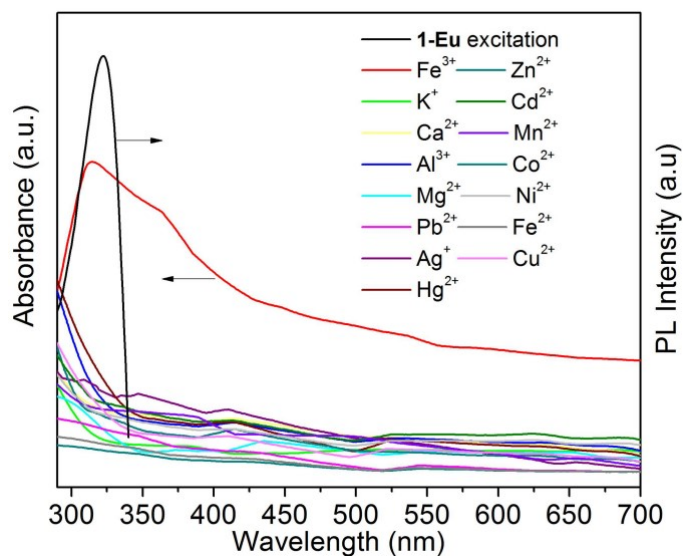

**Fig. S7** UV-Vis adsorption spectrum of **1-Eu**@cations aqueous solution with the same concentration of  $1 \times 10^{-4}$  mol·L<sup>-1</sup> and the excitation spectrum of **1-Eu**.

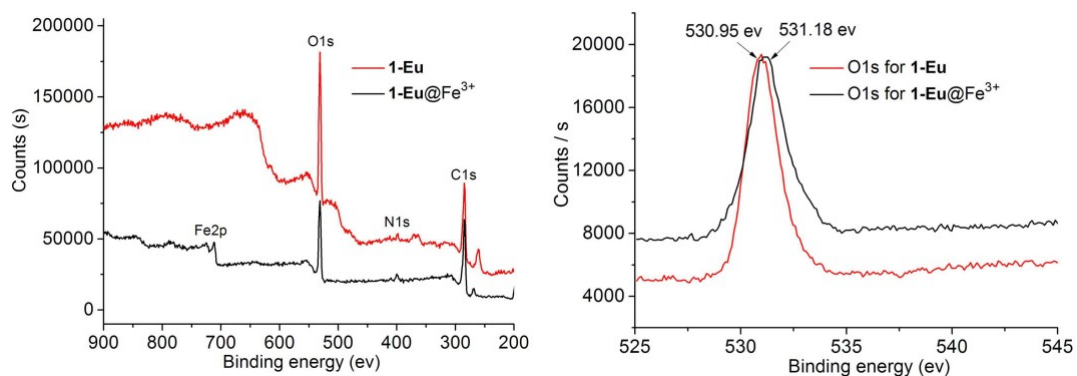

**Fig. S8** Comparison of the XPS spectra of 1-Eu before and after treatment with Fe<sup>3+</sup> ions: overall spectra (left) and O 1s (right).

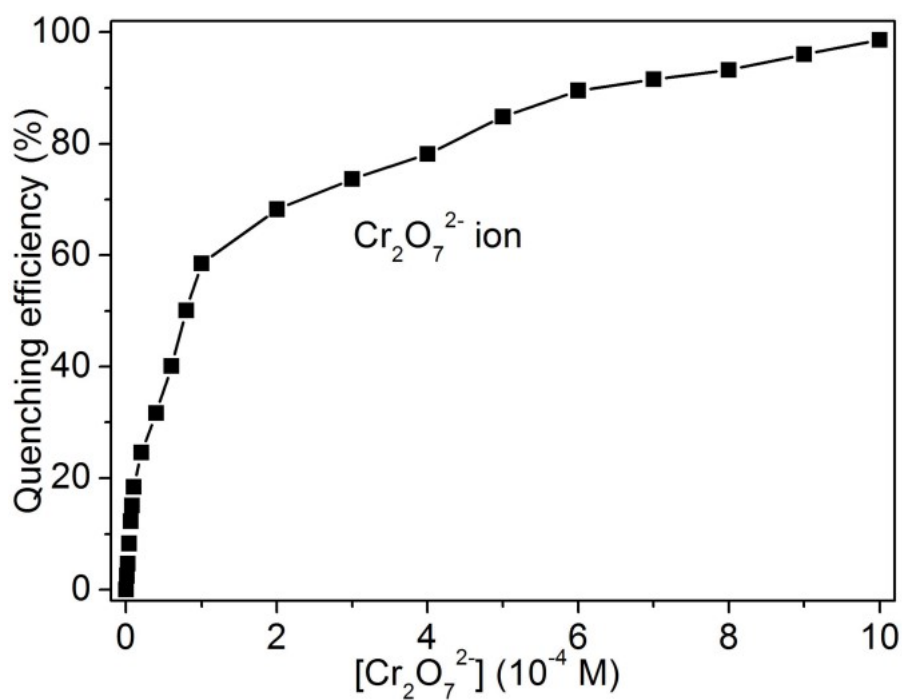

**Fig. S9** Quenching efficiency of 1-Eu dispersed in H<sub>2</sub>O with the addition of Cr<sub>2</sub>O<sub>7</sub><sup>2-</sup> solution.

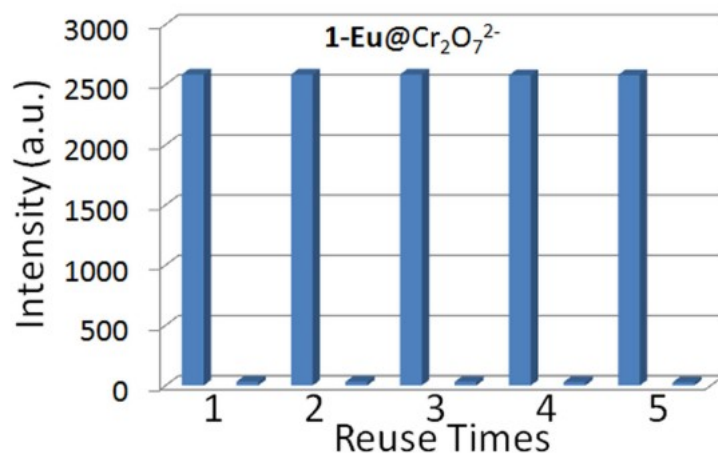

**Fig. S10** Repeatability of the quenching ability of **1-Eu** in H<sub>2</sub>O and in the presence of Cr<sub>2</sub>O<sub>7</sub><sup>2-</sup> (1 mM) ( $\lambda_{\text{ex}} = 322$  nm).

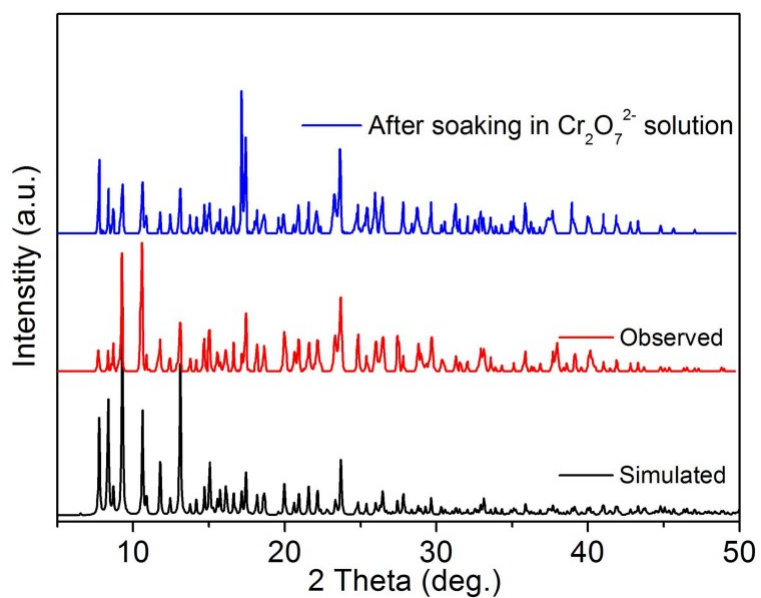

**Fig. S11** PXRD patterns of **1-Eu** after soaking in Cr<sub>2</sub>O<sub>7</sub><sup>2-</sup> solutions.



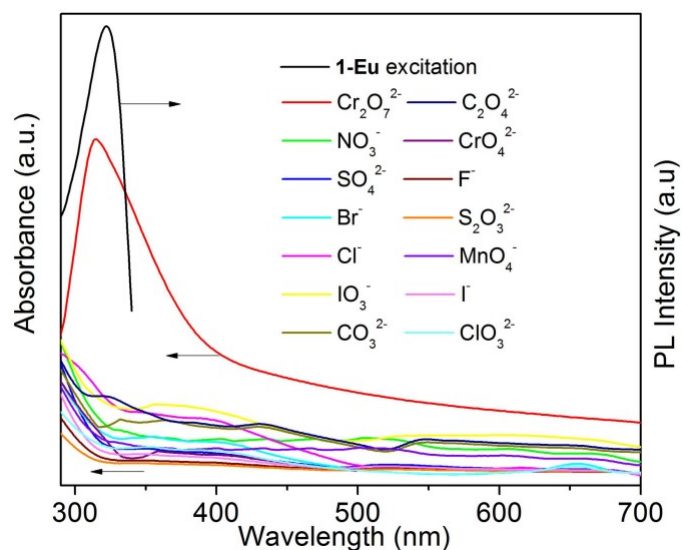

**Fig. S12** UV-Vis adsorption spectrum of **1-Eu@anions** aqueous solution with the same concentration of  $1 \times 10^{-4} \text{ mol} \cdot \text{L}^{-1}$  and the excitation spectrum of **1-Eu**.

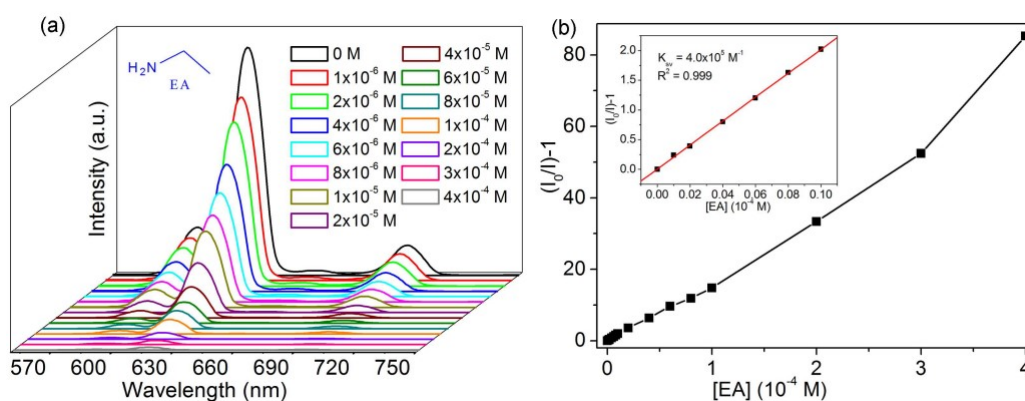

**Fig. S13** (a) Emission spectra of **1-Eu** by the gradual addition of EA aqueous solution; (b) The Stern-Volmer plot of **1-Eu** for EA.

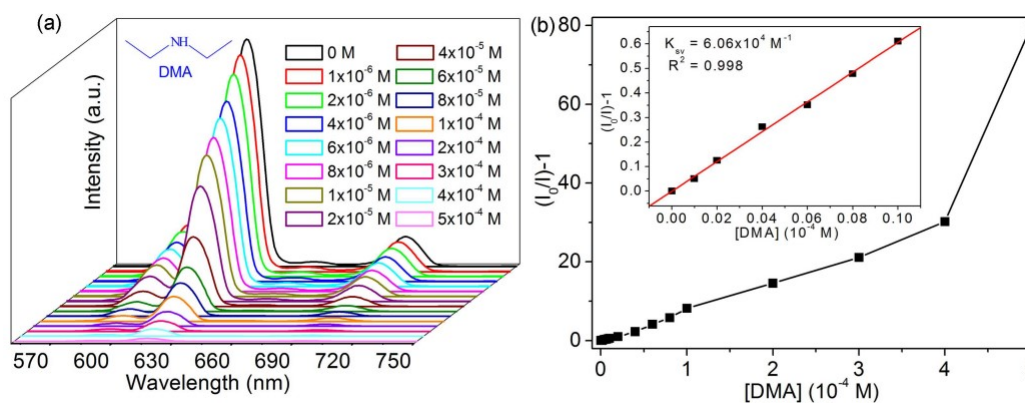

**Fig. S14** (a) Emission spectra of **1-Eu** by the gradual addition of DMA aqueous

solution; (b) The Stern-Volmer plot of **1-Eu** for DMA.

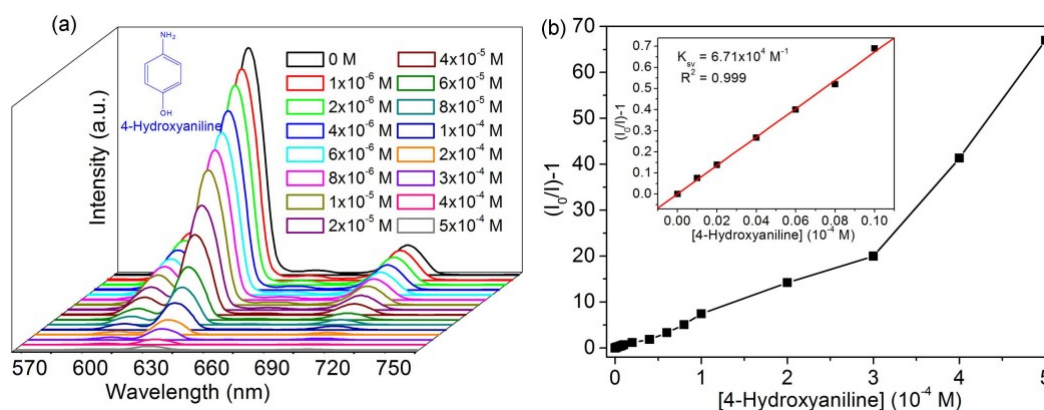

**Fig. S15** (a) Emission spectra of **1-Eu** by the gradual addition of 4-Hydroxyaniline aqueous solution; (b) The Stern-Volmer plot of **1-Eu** for 4-Hydroxyaniline.

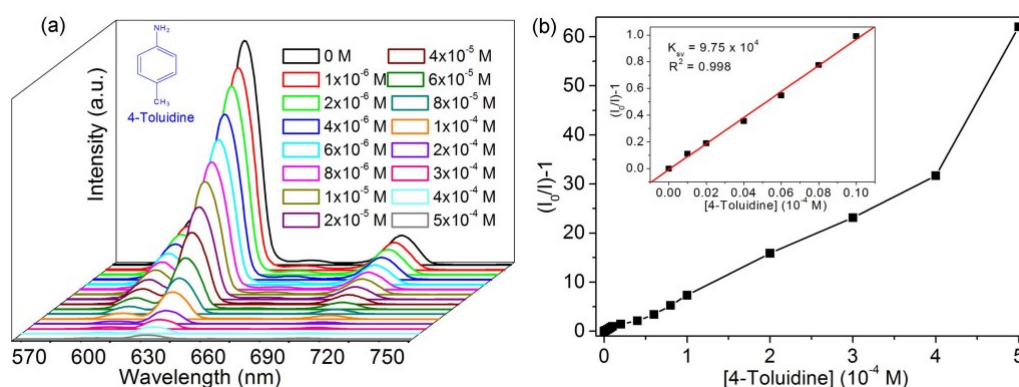

**Fig. S16** (a) Emission spectra of **1-Eu** by the gradual addition of 4-Toluidine aqueous solution; (b) The Stern-Volmer plot of **1-Eu** for 4-Toluidine.

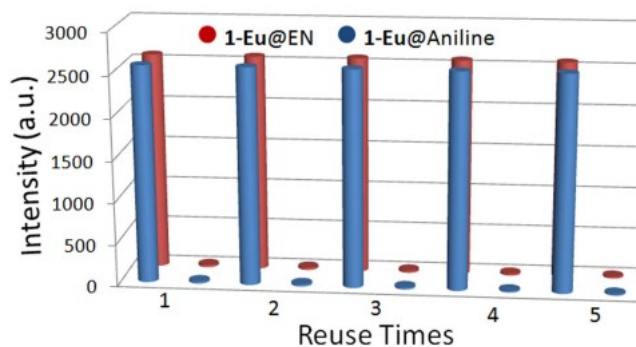

**Fig. S17** Repeatability of the quenching ability of **1-Eu** in H<sub>2</sub>O and in the presence of

EN (1 mM) and Aniline (1 mM) ( $\lambda_{\text{ex}} = 322 \text{ nm}$ ).

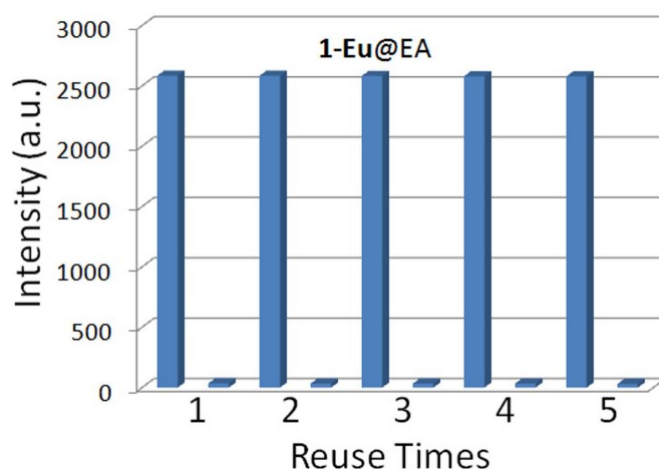

**Fig. S18** Repeatability of the quenching ability of **1-Eu** in  $\text{H}_2\text{O}$  and in the presence of EA (1 mM) ( $\lambda_{\text{ex}} = 322 \text{ nm}$ ).

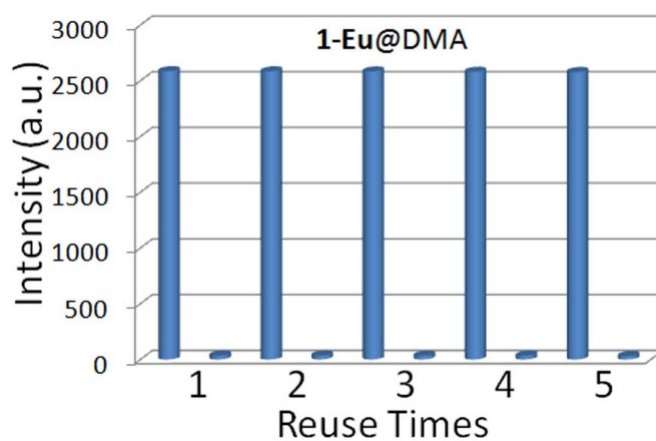

**Fig. S19** Repeatability of the quenching ability of **1-Eu** in  $\text{H}_2\text{O}$  and in the presence of DMA (1 mM) ( $\lambda_{\text{ex}} = 322 \text{ nm}$ ).

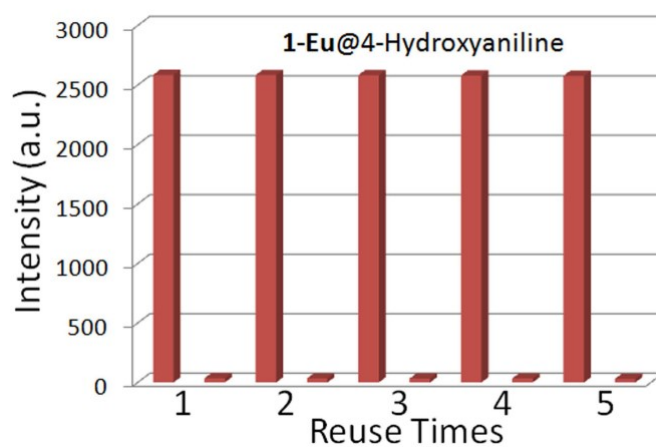

**Fig. S20** Repeatability of the quenching ability of **1-Eu** in  $\text{H}_2\text{O}$  and in the presence of

4-Hydroxyaniline (1 mM) (1 mM) ( $\lambda_{\text{ex}} = 322 \text{ nm}$ ).

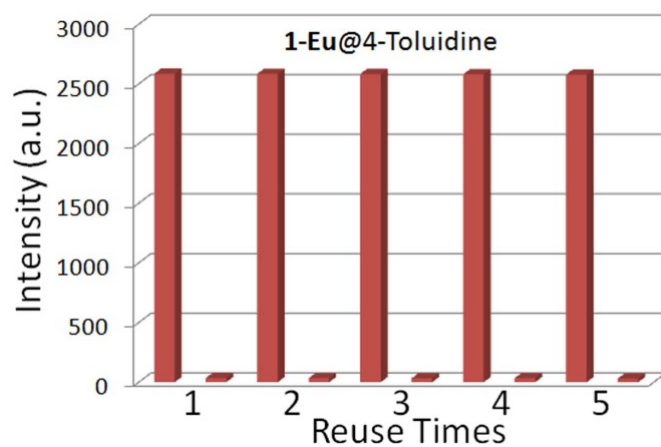

**Fig. S21** Repeatability of the quenching ability of **1-Eu** in  $\text{H}_2\text{O}$  and in the presence of 4-Toluidine (1 mM) ( $\lambda_{\text{ex}} = 322 \text{ nm}$ ).

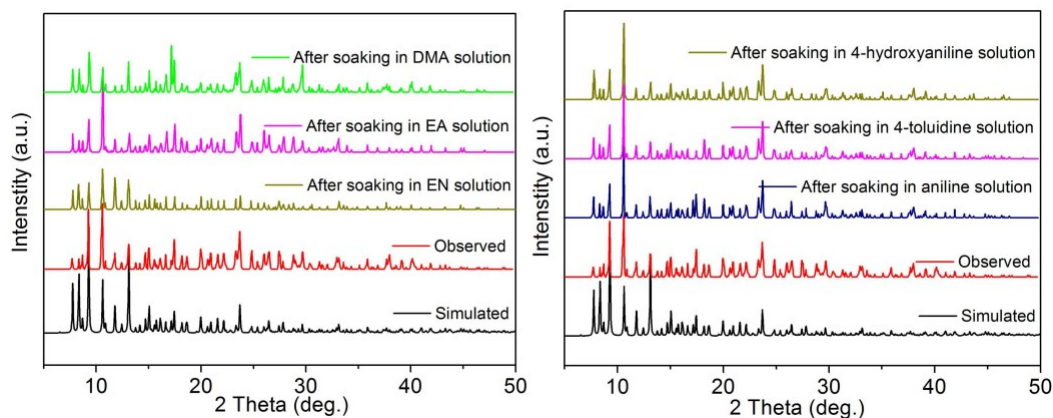

**Fig. S22** PXRD patterns of **1-Eu** after soaking in EN, EA, DMA, Aniline, 4-Hydroxyaniline and 4-Toluidine solutions.

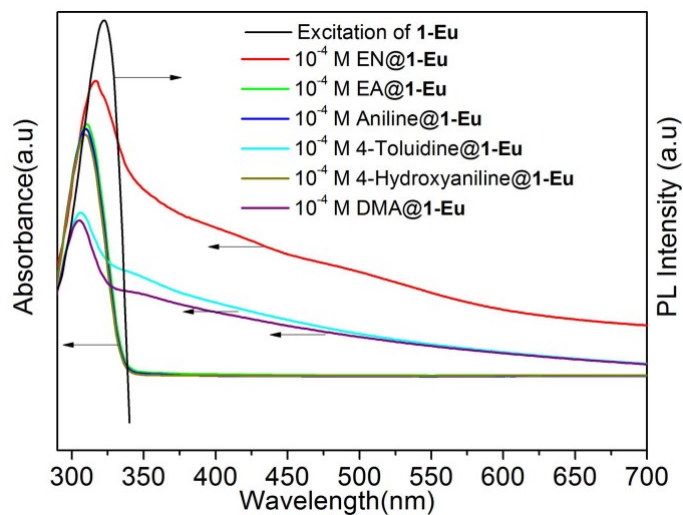

**Fig. 23** UV-Vis adsorption spectrum of **1-Eu@amines** aqueous solution with the same concentration of  $1 \times 10^{-4} \text{ mol} \cdot \text{L}^{-1}$  and the excitation spectrum of **1-Eu**.
